# Supplementary material
Source: PubMed Central journal article supplement (PMC7848588)
Supplement: pnas.2018289118.sapp.pdf [file pnas.2018289118.sapp.pdf]

# PNAS

[www.pnas.org](http://www.pnas.org)

Supplementary Information for

Glycoconjugate pathway connections revealed by sequence similarity network analysis of the monotopic phosphoglycosyl transferases

Katherine H. O'Toole<sup>1</sup>, Barbara Imperiali<sup>2,3\*</sup>, and Karen N. Allen<sup>1\*</sup>

\*Corresponding authors: Karen N. Allen, [drkallen@bu.edu](mailto:drkallen@bu.edu); Barbara Imperiali, [imper@mit.edu](mailto:imper@mit.edu)

**This PDF file includes:**

Supplementary text  
Figures S1 to S4  
Tables S1 to S4  
SI References

**Other supplementary materials for this manuscript include the following:**

Datasets S1 to S4

**InterPro or Pfam families included in outlier classification:** Radical SAM (IPR007197), Phosphoglucose isomerase (IPR001672), Methyltransferase FkbM (IPR006342), Cytidyltransferase-like domain (IPR004821), HpcH/Hpal aldolase/citrate lyase domain (IPR005000), VanZ-like (IPR006976), Surfeit locus 1/Shy1 (IPR002994), Aminoacyl-tRNA synthetase, class Ic (IPR002305), Domain of unknown function DUF4422 (IPR025536), Exosortase (IPR019127), Polysaccharide biosynthesis protein (PF13440), Domain of unknown function DUF4062 (IPR025139), Uncharacterised protein family YfhO (IPR018580), ATP-grasp in the biosynthetic pathway with Ter operon (PF15632), Inositolphosphotransferase Aur1/Ipt1 (IPR026841), O-antigen ligase-related (IPR007016), Methyltransferase 23 (PF13489), Glycoside hydrolase family 10 domain (IPR001000), Protein of unknown function DUF4012 (IPR025101), Methyltransferase type 11 (IPR013216), PEP-CTERM protein-sorting domain (IPR013424), Molybdopterin oxidoreductase (IPR006656), Acidic fibroblast growth factor intracellular-binding protein (IPR008614), Glycosyl transferase, family 4 (IPR000715), and Haloacid dehalogenase-like hydrolase (IPR041492).

**Table S1.** Sugar-modifying domain families

| <b>InterPro Family</b>                                        | <b>Highest ID (%)<br/>predicted homolog</b> | <b>Predicted function</b>                  | <b>Location of<br/>domain</b> |
|---------------------------------------------------------------|---------------------------------------------|--------------------------------------------|-------------------------------|
| CapD-like domain (IPR003869)                                  | CapD (37-41%)                               | C2',4' dehydratase                         | C-term                        |
| Hexapeptide repeat (IPR001451)                                | EpsM (38-39%) & PglD (38-40%)               | acetyltransferase                          | C-term                        |
| NAD-dependent epimerase/dehydratase (IPR001509)               | Inconclusive                                | epimerase/<br>dehydratase                  | both observed                 |
| PglD, N-terminal (IPR041561)                                  | EpsM (38-39%) & PglD (39-40%)               | acetyltransferase                          | C-term                        |
| GNAT domain (IPR000182)                                       | <i>E. coli</i> RimI                         | acetyltransferase                          | both observed                 |
| NAD(P)-binding domain (IPR016040)                             | CapD, PglF, PseB (15-20%)                   | dehydratase                                | N-term                        |
| DegT/DnrJ/EryC1/StrS aminotransferase (IPR000653)             | WbpE (30-37% ID)                            | aminotransferase                           | both observed                 |
| Acyltransferase 3 (IPR002656)                                 | WechH (21-22%)                              | acyltransferase                            | C-term                        |
| RmlD-like substrate binding domain (IPR029903)                | <i>S. enterica</i> RmlD (19%)               | reductase                                  | C-term                        |
| UDP-glucose/GDP-mannose dehydrogenase, C-terminal (IPR014027) | <i>B. subtilis</i> TuaD (25%)               | dehydrogenase                              | both observed                 |
| Nucleotidyl transferase (IPR005835)                           | GlmU (15-20%)                               | acetyltransferase &<br>uridylyltransferase | C-term                        |

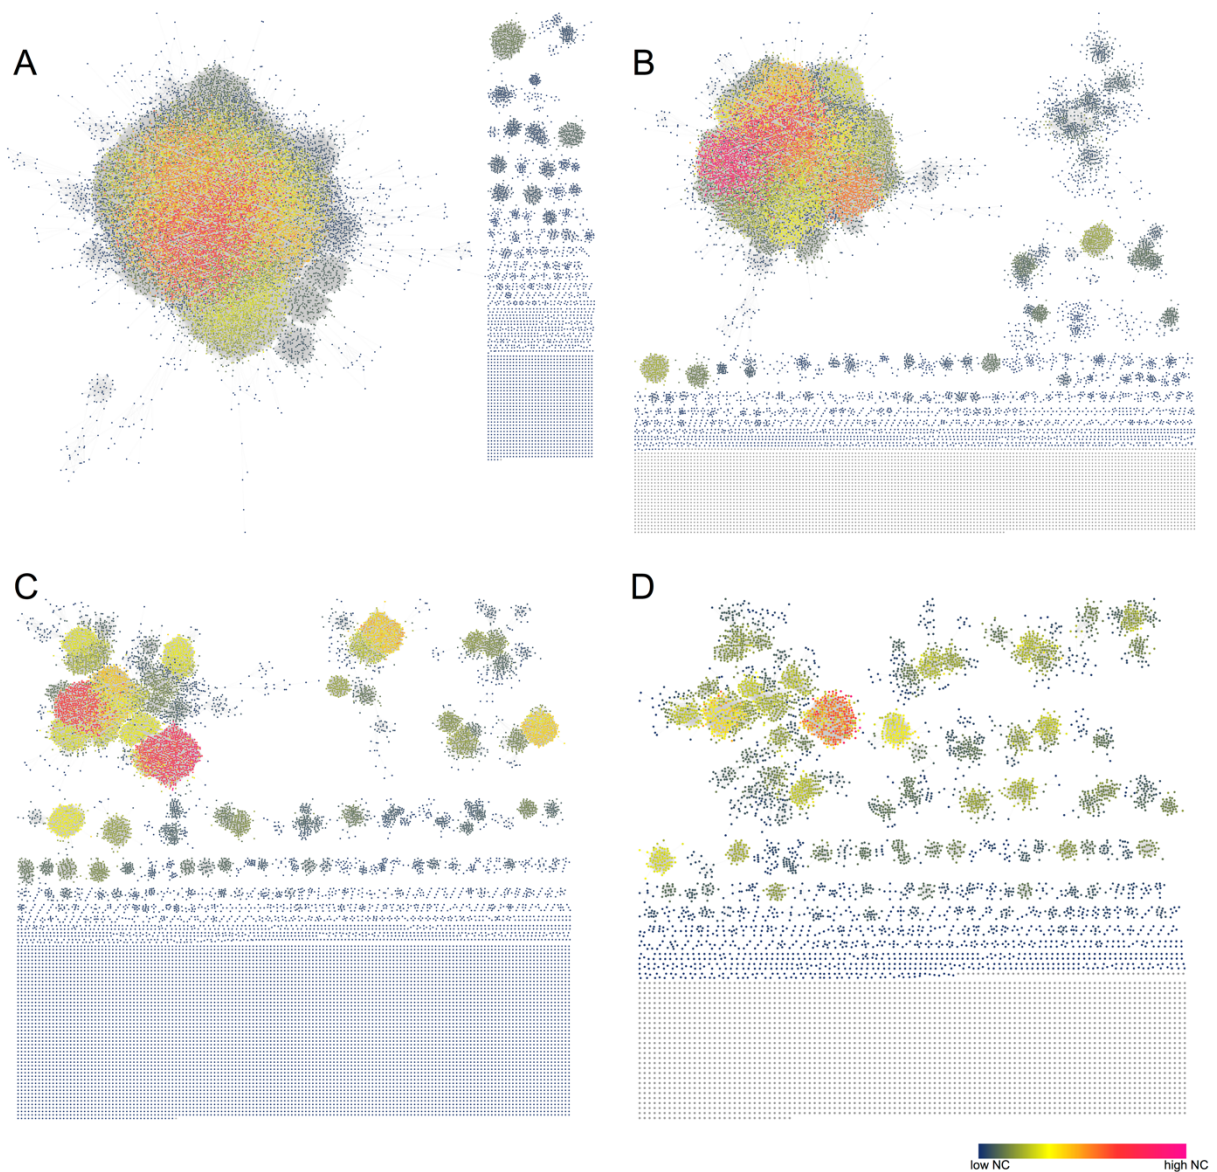

**Figure S1.** Sequence similarity network of the monoPGT superfamily varying  $E$ -value cutoff and % identity, colored by neighborhood connectivity (NC) from blue (low NC) to pink (high NC). A. 70% ID representative node network,  $E$ -value cutoff of  $1 \times 10^{-60}$  with NC scale from 1-1657, B 70% ID representative node network,  $E$ -value cutoff of  $1 \times 10^{-75}$  with NC scale from 1-746, C. 70% ID representative node network,  $E$ -value cutoff of  $1 \times 10^{-90}$  with NC scale from 1-505, D. 40% ID representative node network,  $E$ -value cutoff of  $1 \times 10^{-90}$  with NC scale from 1-189.

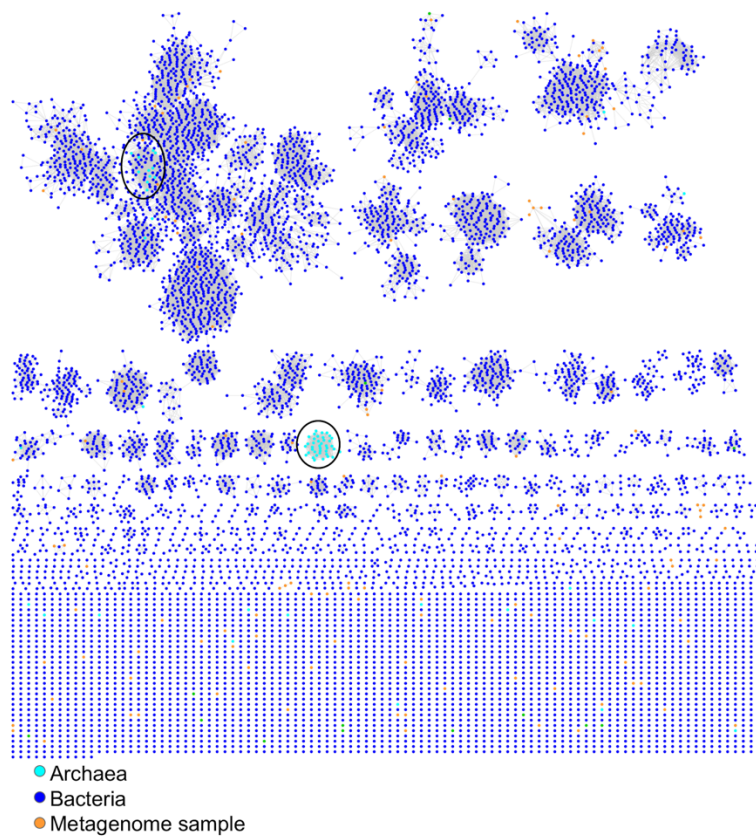

**Figure S2.** Sequence similarity network of the monoPGT superfamily colored by domain of life. The circled regions indicate locations of archaeal sequences. The network is a 40% representative node network with edges representing an  $E$ -value cutoff of  $1 \times 10^{-90}$ .

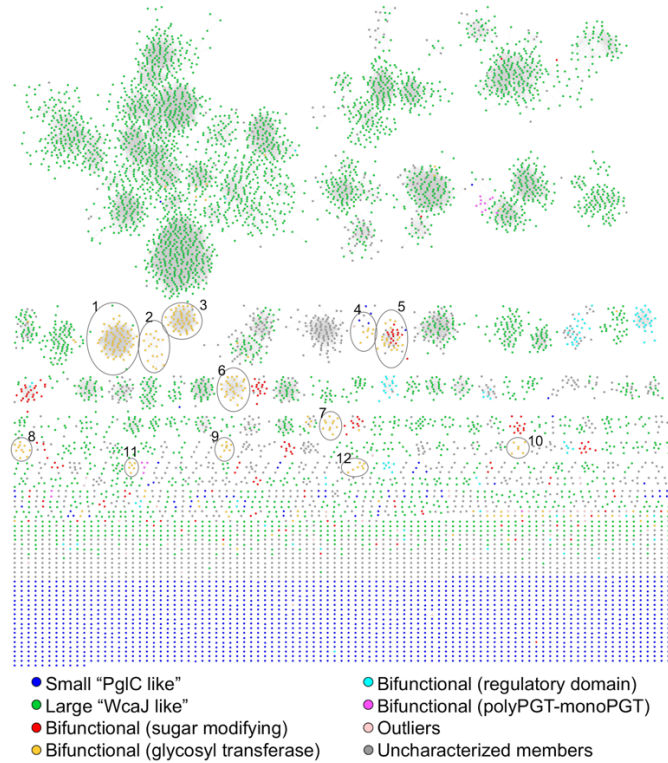

| GT cluster | InterPro or Pfam family                                    | Highest ID (%) predicted homolog | Location of domain |
|------------|------------------------------------------------------------|----------------------------------|--------------------|
| 1          | GT-2 like (IPR001173) or Galactosyltransferase (IPR027791) | WbbL (23-38%)                    | N-term             |
| 2          | GT WecB/TagA/CpsF (IPR004629)                              | TagA (28-30%)                    | C-term             |
| 3          | GT WecB/TagA/CpsF (IPR004629)                              | TagA (25-31%)                    | N-term             |
| 4          | GT-2 like (IPR001173)                                      | PglI (11-25%)                    | C-term             |
| 5          | GT-2 like (IPR001173) or GT, family 1 (IPR001296)          | PglA (22-28%)                    | N-term             |
| 6          | GT like family 2 (PF13641)                                 | GfT2 (15-20%)                    | N-term             |
| 7          | GT-2 like (IPR001173)                                      | PglI (18-23%)                    | N-term             |
| 8          | GT, family 1 (IPR001296) or GT1 subfamily 4 (IPR028098)    | inconclusive                     | N-term             |
| 9          | GT1 subfamily 4 (IPR028098)                                | inconclusive                     | N-term             |
| 10         | GT, family 1 (IPR001296) or GT1 subfamily 4 (IPR028098)    | PglA (24-32%)                    | N-term             |
| 11         | GT WecB/TagA/CpsF (IPR004629)                              | TagA (28-41%)                    | C-term             |
| 12         | GT, family 1 (IPR001296) or GT1 subfamily 4 (IPR028098)    | inconclusive                     | N-term             |

**Figure S3.** Sequence similarity network of the monoPGT superfamily colored by structural family (40% ID representative node network,  $E$ -value cutoff of  $1 \times 10^{-90}$ ). Glycosyl transferase bifunctional enzyme clusters are circled, numbered, and annotated in the table based on highest predicted SwissProt verified homolog.

**Table S2.** Regulatory domain families

| <b>InterPro Family</b>                                                   | <b>Protein with highest sequence identity</b>                                            | <b>Predicted function</b>          | <b>Location of domain</b> |
|--------------------------------------------------------------------------|------------------------------------------------------------------------------------------|------------------------------------|---------------------------|
| Signal transduction response regulator, receiver domain (IPR001789)      | <i>E. coli</i> CpxR (~30-40%) & <i>P. aeruginosa</i> C-di-GMP phosphodiesterase (24-37%) | signal receiver, regulatory        | both observed             |
| Sulphate transporter and anti-sigma factor antagonist domain (IPR002645) | <i>B. subtilis</i> SpoIIAA (20-30%)                                                      | anti-anti sigma factor, regulatory | N-term                    |
| AAA domain (IPR025669)                                                   | <i>S. aureus</i> CapB (39%)                                                              | tyrosine kinase, regulatory        | N-term                    |

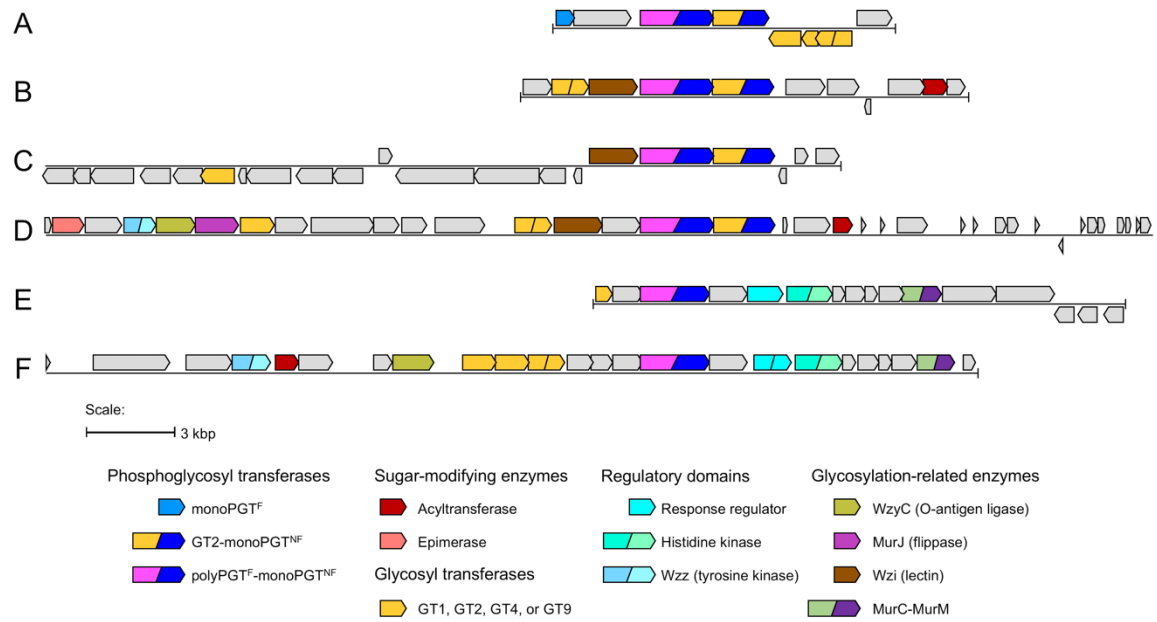

**Figure S4.** Genome neighborhood diagram of select polyPGT<sup>F</sup>-monoPGT<sup>NF</sup> genes. Representation of the genome neighborhood network. UniProt IDs for the polyPGT<sup>F</sup>-monoPGT<sup>NF</sup> genes selected: A0A1V4RUK6 (A), A0A3M2FN56 (B), A0A3N9MXS9 (C), H1XS79 (D), A0A1F4X332 (E), A0A1F4XPX4 (F).



**Table S3.** UniProt IDs included in phylogenetic reconstruction. UniProt IDs are listed starting with the starred branch and following in a clockwise manner.

| UniProt ID | Organism                                                | UniProt Protein Name*                                                          | PGT Subclass                       |
|------------|---------------------------------------------------------|--------------------------------------------------------------------------------|------------------------------------|
| A0A1G0P652 | <i>Ignavibacteria bacterium</i>                         | Bac_transf domain-containing protein                                           | large                              |
| A0A1F7QQD9 | <i>Candidatus Saccharibacteria bacterium</i>            | UDP-phosphate galactose phosphotransferase                                     | large                              |
| A0A167G8C9 | <i>Ulvibacter sp. LPB0005</i>                           | Phosphosugar transferase                                                       | small                              |
| A0A2E0W3V7 | <i>Ignavibacteriae bacterium</i>                        | Glycosyl transferase                                                           | Bifunctional/ glycosyl transferase |
| A0A1I2MZI2 | <i>Pontibacter chinhatensis</i>                         | Undecaprenyl-phosphate glucose phosphotransferase                              | large                              |
| A0A257J4M7 | <i>Alphaproteobacteria bacterium PA2</i>                | Bac_transf domain-containing protein                                           | large                              |
| A0A063XYI9 | <i>Nitricola laciaponensis</i>                          | Undecaprenyl-phosphate galactosephosphotransferase                             | large                              |
| P71241     | <i>Escherichia coli (strain K12)</i>                    | UDP-glucose:undecaprenyl-phosphate glucose-1-phosphate transferase             | large                              |
| A0A1Z8TXU5 | <i>Verrucomicrobia bacterium TMED56</i>                 | Bac_transf domain-containing protein                                           | large                              |
| A0A2H3K9V0 | <i>Flavobacterium branchiophilum</i>                    | Phosphosugar transferase                                                       | uncharacterized                    |
| A0A0A6PLW0 | <i>Candidatus Thiomargarita nelsonii</i>                | Uncharacterized protein                                                        | Bifunctional/ sugar-modifying      |
| A0A1F4YGZ9 | <i>candidate division Zixibacteria bacterium</i>        | Bac_transf domain-containing protein                                           | Bifunctional/ polyPGT-monoPGT      |
| A0A078M711 | <i>Jeotgalicoccus saudimassiliensis</i>                 | Putative phosphosugar transferase EpsL                                         | small                              |
| A0A1V6I822 | <i>Candidatus Marinimicrobia bacterium ADurb.Bin030</i> | Putative undecaprenyl-phosphate N-acetylglucosaminyl 1-phosphate transferase   | Bifunctional/ polyPGT-monoPGT      |
| A0A0D1F875 | <i>Vibrio parahaemolyticus 901128</i>                   | Uncharacterized protein                                                        | small                              |
| A0A1I2K568 | <i>Clostridium cadaveris</i>                            | Exopolysaccharide biosynthesis polyprenyl glycosylphosphotransferase           | large                              |
| A0A1I0S5X7 | <i>Chitinophaga arvensicola</i>                         | Phosphosugar transferase involved in LPS biosynthesis (Colanic, teichoic acid) | uncharacterized                    |
| A0A1E4A3B2 | <i>Cytophagaceae bacterium SCN 52-12</i>                | Phosphosugar transferase                                                       | Bifunctional/ regulatory           |
| A0A1M3LES6 | <i>Micrococcales bacterium 73-13</i>                    | Glutamate synthase subunit alpha                                               | Bifunctional/ uncharacterized      |
| A0A1G8UVZ4 | <i>Pedobacter sp. ok626</i>                             | Phosphosugar transferase involved in LPS biosynthesis (Colanic, teichoic acid) | regulatory                         |

|                   |                                            |                                                                                |                                    |
|-------------------|--------------------------------------------|--------------------------------------------------------------------------------|------------------------------------|
| <b>A0A2A5DCU0</b> | <i>Planctomycetes bacterium</i>            | Bac_transf domain-containing protein                                           | large                              |
| <b>A0A2G6GHL8</b> | <i>Chloroflexi bacterium</i>               | Uncharacterized protein                                                        | Bifunctional/ glycosyl transferase |
| <b>A0A2H6FVN3</b> | <i>bacterium BMS3Abin10</i>                | UDP-N-acetyl-alpha-D-glucosamine C6 dehydratase                                | Bifunctional/ regulatory           |
| <b>A0A0P0NFR9</b> | <i>Pedobacter sp. PACM 27299</i>           | Glycosyl transferase                                                           | small                              |
| <b>A0A0A2DUD0</b> | <i>Porphyromonas sp. COT-239 OH1446</i>    | Glycosyl transferase                                                           | small                              |
| <b>A0A077EHY8</b> | <i>Elizabethkingia anophelis NUHP1</i>     | Lipid carrier: UDP-N-acetylgalactosaminyltransferase                           | small                              |
| <b>A0A0E9MUH9</b> | <i>Flaviumibacter petaseus NBRC 106054</i> | Putative glycosyltransferase                                                   | large                              |
| <b>A0A0B2JXH2</b> | <i>Anaerovibrio lipolyticus</i>            | Bac_transf domain-containing protein                                           | small                              |
| <b>A0A345Y3H3</b> | <i>Crenobacter cavernae</i>                | NAD-dependent epimerase/dehydratase family protein                             | Bifunctional/ sugar-modifying      |
| <b>A0A0X8X646</b> | <i>Mucilaginibacter gotjawali</i>          | UDP-glucose:undecaprenyl-phosphate glucose-1-phosphate transferase             | large                              |
| <b>A0A0L6JVG9</b> | <i>Pseudobacteroides cellulosolvens</i>    | Undecaprenyl-phosphate galactose phosphotransferase                            | small                              |
| <b>P95706</b>     | <i>Staphylococcus aureus</i>               | Bacterial phosphosugar transferase (CapM)                                      | small                              |
| <b>A0A1G7HH12</b> | <i>Halorientalis regularis</i>             | Phosphosugar transferase involved in LPS biosynthesis (Colanic, teichoic acid) | large                              |
| <b>A0A0A7PG93</b> | <i>Sphingopyxis fribergensis</i>           | Phosphosugar transferase                                                       | small                              |
| <b>A0A2E7Q4P5</b> | <i>Rhodobacteraceae bacterium</i>          | Phosphosugar transferase                                                       | Bifunctional/ sugar-modifying      |
| <b>A0A1I3C877</b> | <i>Halomonas xianhensis</i>                | Exopolysaccharide biosynthesis polyprenyl glycosylphosphotransferase           | large                              |
| <b>A0A0K6GZ10</b> | <i>Idiomarina woesei</i>                   | Exopolysaccharide biosynthesis polyprenyl glycosylphosphotransferase           | large                              |
| <b>A0A0U2WZ63</b> | <i>Enterococcus rotai</i>                  | UDP-phosphate galactose phosphotransferase                                     | large                              |
| <b>A0A0G1ASD6</b> | <i>Parcubacteria group bacterium</i>       | Phosphosugar transferase                                                       | large                              |
| <b>A0A0C2URJ0</b> | <i>Sulfurovum sp. AS07-7</i>               | Phosphosugar transferase                                                       | Bifunctional/ uncharacterized      |
| <b>A0A1H1TW74</b> | <i>Opitutus sp. GAS368</i>                 | Exopolysaccharide biosynthesis polyprenyl glycosylphosphotransferase           | large                              |
| <b>A0A0Q5UNY3</b> | <i>Sphingomonas sp. Leaf198</i>            | Phosphosugar transferase                                                       | large                              |
| <b>A0A0A6XW68</b> | <i>Bacillus ginsengihumi</i>               | UDP-phosphate N-acetylgalactosaminyl-1-phosphate transferase                   | small                              |

|                   |                                                      |                                                                                        |                                    |
|-------------------|------------------------------------------------------|----------------------------------------------------------------------------------------|------------------------------------|
| <b>A0A0A2GWW3</b> | <i>Dokdonia donghaensis</i> DSW-1                    | Phosphosugar transferase                                                               | large                              |
| <b>A0A1Z4RGQ1</b> | <i>Calothrix</i> sp. NIES-4101                       | Phosphosugar transferase                                                               | large                              |
| <b>A0A081NKA5</b> | <i>Endozoicomonas numazuensis</i>                    | Phosphosugar transferase                                                               | small                              |
| <b>A0A0S2K1K2</b> | <i>Pseudoalteromonas phenolica</i>                   | Intercellular adhesion protein A                                                       | Bifunctional/ glycosyl transferase |
| <b>A0A1F2RMI6</b> | <i>Acidobacteria bacterium</i>                       | Bac_transf domain-containing protein                                                   | regulatory                         |
| <b>A0A3A4R061</b> | <i>Anaerolineaceae bacterium</i>                     | Bac_transf domain-containing protein                                                   | large                              |
| <b>A0A081GQD0</b> | <i>Cyanobium</i> sp. CACIAM 14                       | Anti-sigma-factor antagonist (STAS) and Phosphosugar transferase                       | Bifunctional/ regulatory           |
| <b>A0A2E2VCH6</b> | <i>Euryarchaeota archaeon</i>                        | Bac_transf domain-containing protein                                                   | large                              |
| <b>A0A1H9DX23</b> | <i>Streptomyces radiopugnans</i>                     | Exopolysaccharide biosynthesis polyprenyl glycosylphosphotransferase                   | large                              |
| <b>Q608Q3</b>     | <i>Methylococcus capsulatus</i>                      | Bacterial Phosphosugar transferase/glycosyl transferase, WecB/TagA/CpsF family protein | Bifunctional/ glycosyl transferase |
| <b>A0A099W939</b> | <i>Listeriaceae bacterium</i> FSL A5-0209            | Bac_transf domain-containing protein                                                   | small                              |
| <b>A0A087C7E0</b> | <i>Bifidobacterium mongoliense</i> DSM 21395         | Exopolysaccharide biosynthesis polyprenyl glycosylphosphotransferase                   | large                              |
| <b>A0A0F2QCV2</b> | <i>Clostridiaceae bacterium</i> BRH_c20a             | Multidrug MFS transporter                                                              | small                              |
| <b>A0A1E5AIQ7</b> | <i>Rhodobacteraceae bacterium</i>                    | UDP-phosphate galactose phosphotransferase                                             | Bifunctional/ glycosyl transferase |
| <b>A0A0S3U064</b> | <i>Leptolyngbya</i> sp. NIES-3755                    | Phosphosugar transferase                                                               | large                              |
| <b>A0A0C2QYQ1</b> | <i>Jeotgalibacillus campisalis</i>                   | Multidrug MFS transporter                                                              | small                              |
| <b>A0A060M6D2</b> | <i>Bacillus lehensis</i> G1                          | Galactosyl transferase CpsE                                                            | small                              |
| <b>A0A0K9GF90</b> | <i>Bacillus</i> sp. FJAT-27916                       | Multidrug MFS transporter                                                              | small                              |
| <b>A0A075LME8</b> | <i>Terribacillus goriensis</i>                       | Multidrug MFS transporter                                                              | small                              |
| <b>A0A0A3HUK8</b> | <i>Lysinibacillus sinduriensis</i> BLB-1 = JCM 15800 | Multidrug MFS transporter                                                              | small                              |
| <b>A0A0D0END6</b> | <i>Bacillus thermoamylovorans</i>                    | Undecaprenyl-phosphate galactosephosphotransferase                                     | small                              |
| <b>A0A098EJU0</b> | <i>Planococcus massiliensis</i>                      | Putative phosphosugar transferase EpsL                                                 | small                              |
| <b>A0A2D5YSD6</b> | <i>Planctomycetaceae bacterium</i>                   | Bac_transf domain-containing protein                                                   | uncharacterized                    |

|                   |                                             |                                                                                |                               |
|-------------------|---------------------------------------------|--------------------------------------------------------------------------------|-------------------------------|
| <b>A0A1W1HNW2</b> | <i>Nitrospira sp. ND1</i>                   | Putative Mannose-1-phosphate guanylyltransferase                               | Bifunctional/ sugar-modifying |
| <b>A0A0P1IMQ4</b> | <i>Thalassobius activus</i>                 | Putative phosphosugar transferase EpsL                                         | small                         |
| <b>A0A0C1GQU2</b> | <i>Ruegeria sp. ANG-R</i>                   | phosphosugar transferase                                                       | small                         |
| <b>A0A0J5T177</b> | <i>Puniceibacterium sp. IMCC21224</i>       | Glycosyl transferase                                                           | small                         |
| <b>A0A0H4KXY5</b> | <i>Marinovum algicola DG 898</i>            | Phosphosugar transferase involved in lipopolysaccharide synthesis              | small                         |
| <b>A0A1E4EEC8</b> | <i>Methylobacterium sp. SCN 67-24</i>       | Bac_transf domain-containing protein                                           | large                         |
| <b>A0A0C2UHH6</b> | <i>Bacillus badius</i>                      | Protein-export membrane protein SecG                                           | small                         |
| <b>A0A031I0P7</b> | <i>Sphingomonas sp. RIT328</i>              | Undecaprenyl-phosphate galactosephosphotransferase                             | small                         |
| <b>A0A011UU28</b> | <i>Aquamicrobium defluvii</i>               | Exopolysaccharide production protein ExoY (phosphosugar transferase)           | small                         |
| <b>A0A1U7J8H2</b> | <i>Phormidium tenue NIES-30</i>             | UDP-phosphate galactose phosphotransferase                                     | large                         |
| <b>A0A0F9AFY9</b> | <i>marine sediment metagenome</i>           | Bac_transf domain-containing protein                                           | small                         |
| <b>A0A017H830</b> | <i>Limimanicola hongkongensis DSM 17492</i> | Undecaprenyl-phosphate galactosephosphotransferase                             | small                         |
| <b>A0A1B0ZPV5</b> | <i>Phaeobacter gallaeciensis</i>            | Exopolysaccharide biosynthesis protein                                         | small                         |
| <b>P26406</b>     | <i>Salmonella enterica</i>                  | Undecaprenyl-phosphate galactose phosphotransferase (WbaP)                     | large                         |
| <b>A0A011Q8T3</b> | <i>Alkalibacterium sp. AK22</i>             | Lipid carrier: UDP-N-acetylgalactosaminyltransferase                           | small                         |
| <b>A0A1F9UCC6</b> | <i>Elusimicrobia bacterium</i>              | Bac_transf domain-containing protein                                           | large                         |
| <b>A0A098BX95</b> | <i>Fermentimonas caenicola</i>              | Bac_transf domain-containing protein                                           | small                         |
| <b>A0A372SQY9</b> | <i>Absiella sp. AM09-45</i>                 | Exopolysaccharide biosynthesis polyprenyl glycosylphosphotransferase           | large                         |
| <b>A0A073IUV1</b> | <i>Synergistes jonesii</i>                  | Bac_transf domain-containing protein                                           | large                         |
| <b>A0A0F6AJN0</b> | <i>Thermotoga sp. (strain RQ2)</i>          | Exopolysaccharide biosynthesis polyprenyl glycosylphosphotransferase           | large                         |
| <b>A0A1G7EX33</b> | <i>Sphingomonas carotiniaciens</i>          | Phosphosugar transferase involved in LPS biosynthesis (Colanic, teichoic acid) | large                         |
| <b>A0A146AWZ9</b> | <i>Bordetella ansorpii</i>                  | Exopolysaccharide biosynthesis glycosyl transferase                            | small                         |
| <b>A0A0N1F5M8</b> | <i>Bosea vaviloviae</i>                     | Bac_transf domain-containing protein                                           | large                         |
| <b>A0A099WFB8</b> | <i>Listeria booriae</i>                     | UDP-galactose phosphate transferase                                            | small                         |

|                   |                                                 |                                                                            |                                    |
|-------------------|-------------------------------------------------|----------------------------------------------------------------------------|------------------------------------|
| <b>A0A365P052</b> | <i>Flavobacterium tibetense</i>                 | Uncharacterized protein                                                    | Bifunctional/ sugar-modifying      |
| <b>A0A085L597</b> | <i>Schleiferia thermophila str. Yellowstone</i> | Phosphosugar transferase                                                   | small                              |
| <b>A0A090VNM3</b> | <i>Algibacter lectus</i>                        | UDP-N-acetylgalactosaminyltransferase                                      | small                              |
| <b>A0A101AVP0</b> | <i>Mycobacterium sp. GA-2829</i>                | UDP-phosphate galactose phosphotransferase                                 | large                              |
| <b>A0A077M629</b> | <i>Tetrasphaera jenkinsii Ben 74</i>            | Putative phosphotransferase involved in extracellular matrix synthesis     | small                              |
| <b>A0A0Q9KUR6</b> | <i>Knoellia sp. Soil729</i>                     | UDP-galactose phosphate transferase                                        | small                              |
| <b>A0A0U4CG29</b> | <i>Hymenobacter sedentarius</i>                 | Bac_transf domain-containing protein                                       | small                              |
| <b>J6UDJ7</b>     | <i>Rhodovulum sp. PH10</i>                      | Lipid carrier: UDP-N-acetylgalactosaminyltransferase                       | large                              |
| <b>A0A0P6XNN7</b> | <i>Thermanaerotherix daxensis</i>               | Bac_transf domain-containing protein                                       | small                              |
| <b>A0A158M4S6</b> | <i>Bordetella holmesii CDC-H585-BH</i>          | Phosphosugar transferase                                                   | small                              |
| <b>A0A1A9DHV8</b> | <i>Streptomyces sp. OspMP-M45</i>               | Exopolysaccharide biosynthesis polyprenyl glycosylphosphotransferase       | large                              |
| <b>A0A099DKB0</b> | <i>Exiguobacterium mexicanum</i>                | Phosphosugar transferase                                                   | small                              |
| <b>A0A031I293</b> | <i>Sphingomonas sp. RIT328</i>                  | Phosphosugar transferase                                                   | small                              |
| <b>A0A1C5T7N5</b> | <i>uncultured Blautia sp.</i>                   | Putative colanic biosynthesis UDP-glucose lipid carrier transferase        | small                              |
| <b>A0A317RJM9</b> | <i>Eubacterium limosum</i>                      | Lipopolysaccharide/colanic/teichoic acid biosynthesis glycosyltransferase  | Bifunctional/ glycosyl transferase |
| <b>A0A0A3IMY7</b> | <i>Lysinibacillus manganicus DSM 26584</i>      | Phosphosugar transferase                                                   | small                              |
| <b>A0A0P0DN04</b> | <i>Sphingopyxis macrogoltabida</i>              | Bac_transf domain-containing protein                                       | small                              |
| <b>A0A0C2YWP4</b> | <i>Sulfurovum sp. AS07-7</i>                    | Bac_transf domain-containing protein                                       | small                              |
| <b>A7ZET4</b>     | <i>Campylobacter concisus</i>                   | N,N'-diacetylbaucillosaminyl-1-phosphate transferase                       | small                              |
| <b>Q0P9D0</b>     | <i>Campylobacter jejuni</i>                     | Undecaprenyl phosphate N,N'-diacetylbaucillosamine 1-phosphate transferase | small                              |
| <b>A0A0K1Q5Q4</b> | <i>Labilithrix luteola</i>                      | Lipid carrier: UDP-N-acetylgalactosaminyltransferase                       | small                              |
| <b>A0A3T1D1W1</b> | <i>Cohnella abietis</i>                         | Uncharacterized protein                                                    | Bifunctional/ glycosyl transferase |
| <b>A0A081BXT8</b> | <i>Candidatus Vecturithrix granuli</i>          | Undecaprenyl-phosphate galactose phosphotransferase                        | small                              |
| <b>D6HAT8</b>     | <i>Neisseria gonorrhoeae DGI2</i>               | Pilin glycosylation protein PglB                                           | Bifunctional/ sugar-modifying      |

|                   |                                   |                          |       |
|-------------------|-----------------------------------|--------------------------|-------|
| <b>A0A081NCB0</b> | <i>Endozoicomonas montiporae</i>  | Phosphosugar transferase | small |
| <b>A0A081N3Q4</b> | <i>Endozoicomonas numazuensis</i> | Phosphosugar transferase | small |

\*UniProt protein name for monoPGT core domain corrected from sugar transferase to phosphosugar transferase

**Table S4.** Characterized members of the monoPGT superfamily

| UniProt ID (reference) | Representative ID* | Protein | PGT Family                       | Organism                      | CHO      | Glycoconjugate        | Structure |
|------------------------|--------------------|---------|----------------------------------|-------------------------------|----------|-----------------------|-----------|
| A7ZET4(1)              | A0A1X9SUU7         | PglC    | small                            | <i>Campylobacter concisus</i> | diNAcBac | N-glycoprotein        | 5W7L      |
| P95706(2)              | A0A133Q0D2         | CapM    | small                            | <i>Staphylococcus aureus</i>  | FucNAc   | Type 5 polysaccharide | N/A       |
| P71241(3)              | A0A1B7HPD9         | WcaJ    | large                            | <i>Escherichia coli (K12)</i> | Glc      | Colanic acid          | N/A       |
| Q0P9D0(4, 5)           | A0A099WFB8         | PglC    | small                            | <i>Campylobacter jejuni</i>   | diNAcBac | N-glycoprotein        | N/A       |
| Q56770(6)              | Q5GXZ0             | GumD    | large                            | <i>Xanthomonas campestris</i> | Glc      | xanthan               | N/A       |
| B3FN88(7)              | A0A3N6XNY4         | WecP    | large                            | <i>Aeromonas hydrophila</i>   | GalNAc   | O-antigen/LPS         | N/A       |
| Q9ABR0(3)              | N/A                | PssY    | small                            | <i>Caulobacter vibriodes</i>  | Glc      | colanic acid          | N/A       |
| P26406(8, 9)           | A0A379W6Q6         | WbaP    | large                            | <i>Salmonella enterica</i>    | Gal      | O-antigen/LPS         | N/A       |
| D6HAT8(10)             | B4RQ09             | PglB    | bifunctional/<br>sugar-modifying | <i>Neisseria gonorrhoeae</i>  | diNAcBac | O-glycoprotein        | N/A       |

\* Representative ID for 70% ID CD-HIT clustering

## SI References

1. Das D, Kuzmic P, & Imperiali B, Analysis of a dual domain phosphoglycosyl transferase reveals a ping-pong mechanism with a covalent enzyme intermediate. *Proc Natl Acad Sci U S A* 114, 7019-7024 (2017).
2. Rausch M, *et al.*, Coordination of capsule assembly and cell wall biosynthesis in *Staphylococcus aureus*. *Nat Commun* 10, 1404 (2019).
3. Patel KB, *et al.*, Functional characterization of UDP-glucose:undecaprenyl-phosphate glucose-1-phosphate transferases of *Escherichia coli* and *Caulobacter crescentus*. *J Bacteriol* 194, 2646-2657 (2012).
4. Glover KJ, Weerapana E, Chen MM, & Imperiali B, Direct biochemical evidence for the utilization of UDP-bacillosamine by PglC, an essential glycosyl-1-phosphate transferase in the *Campylobacter jejuni* N-linked glycosylation pathway. *Biochemistry* 45, 5343-5350 (2006).
5. Lukose V, *et al.*, Conservation and Covariance in Small Bacterial Phosphoglycosyltransferases Identify the Functional Catalytic Core. *Biochemistry* 54, 7326-7334 (2015).
6. Katzen F, *et al.*, *Xanthomonas campestris* pv. *campestris* gum mutants: effects on xanthan biosynthesis and plant virulence. *J Bacteriol* 180, 1607-1617 (1998).
7. Merino S, *et al.*, A UDP-HexNAc:polyprenol-P GalNAc-1-P transferase (WecP) representing a new subgroup of the enzyme family. *J Bacteriol* 193, 1943-1952 (2011).
8. Patel KB, Ciepichal E, Swiezewska E, & Valvano MA, The C-terminal domain of the *Salmonella enterica* WbaP (UDP-galactose:Und-P galactose-1-phosphate transferase) is sufficient for catalytic activity and specificity for undecaprenyl monophosphate. *Glycobiology* 22, 116-122 (2012).
9. Saldías MS, *et al.*, Distinct functional domains of the *Salmonella enterica* WbaP transferase that is involved in the initiation reaction for synthesis of the O antigen subunit. *Microbiology* 154, 440-453 (2008).
10. Hartley MD, *et al.*, Biochemical characterization of the O-linked glycosylation pathway in *Neisseria gonorrhoeae* responsible for biosynthesis of protein glycans containing N,N'-diacetylbacillosamine. *Biochemistry* 50, 4936-4948 (2011).
